# Supplementary material for: Metabolomics in Glaucoma: A Systematic Review
Source: PubMed Central journal article supplement — Invest Ophthalmol Vis Sci. 2021 May 6;62(6):9. doi: 10.1167/iovs.62.6.9 (PMC8107647; doi:10.1167/iovs.62.6.9), 2021-05-06
Supplement: iovs-62-6-9_s002.pdf [file iovs-62-6-9_s002.pdf]

**Supplementary Table 2** Significant metabolites to patients with glaucoma that identified by metabolomic methods.

| First Authors<br>(Year)           | Metabolomics<br>methodology | Targeted<br>/Untargeted | Up-regulation                                                                                                                                                                                                                              | Down-regulation                                                                                  |
|-----------------------------------|-----------------------------|-------------------------|--------------------------------------------------------------------------------------------------------------------------------------------------------------------------------------------------------------------------------------------|--------------------------------------------------------------------------------------------------|
| <b>OAG</b>                        |                             |                         |                                                                                                                                                                                                                                            |                                                                                                  |
| Cabrerizo<br>(2017) <sup>20</sup> | UPLC-MS                     | targeted                | SM(d18:2/16:0), SM(d18:1/18:0), SM(36:2), SM(42:3), SM(d18:2/22:0), ChoE(16:0), SM(38:1), PC(18:0/18:2), ChoE(18:2), PC(O-24:1/20:4), ChoE(18:1), SM(d18:2/20:0), SM(d18:1/16:0), ChoE(20:4), ChoE(20:3), PC(P-16:0/20:4), PC(O-22:0/20:4) | PC(40:1), PC(O-38:4), DAPC_5, MEMAPC_20                                                          |
| Buisset<br>(2019) <sup>21</sup>   | HPLC-MS                     | targeted                | PC aa C34:1, PC aa C36:2, PC aa C36:4, PC aa C38:4, PC aa C32:1, PC aa C34:2, PC aa C30:2, Lyso PC a C28:1, SM C18:1, Gln, Gly, Ala, Leu, Ile, hydroxyproline, acetyl-ornithine, carnitine, Crea, C2, C3, C4                               | Tau, spermine                                                                                    |
| Myer<br>(2020) <sup>22</sup>      | 1H-NMR<br>&LC-MS            | untargeted              | Lys, Arg, Cys, Gly, anthranilate, ascorbate, 4-hydroxybenzoate, myo-inositol, acetate, propylene glycol, 2-hydroxybutyrate, Cr, Cho                                                                                                        | phenylalanine, Gln, 4-aminobutanoate, isopropanol, Thr                                           |
| Pan<br>(2020) <sup>23</sup>       | GC-MS                       | untargeted              | 2-mercaptoethanesulfonic acid 2, D-erythronolactone 2, D-Talose 1, Dehydroascorbic Acid 2, Galactose 1, Mannose 1, Pelargonic acid, Ribitol                                                                                                | Biotin, Glucose-1-phosphate, Methylmalonic acid, N-cyclohexylformamide 1, Sorbitol, Spermidine 2 |
| Burgess<br>(2015) <sup>24</sup>   | LC-MS                       | untargeted              | Palmitoylcarnitine, C17, Pentadecanone, Heptadecanone, Heptadecanediol, Hydroxytetradecanedioic acid, HODE-cholesteryl ester, Diapo-zeta-carotene (terpene), Ergostanol, Heptadecylbenzenediol, Ergosterol                                 | C19, Complex glycosphingolipid                                                                   |
| Leruez<br>(2018) <sup>25</sup>    | LC-MS                       | targeted                | Tyr, Met, hexose, PC ae 40:1, MetSO, C3, PC aa 34:2, PC aa 34:4, PC aa 36:4, C4, C10:1, C12:1, Arg                                                                                                                                         | spermidine, spermine, octadecadienyl-carnitine, C18:1, histamine                                 |

|                                             |         |            |                                                                                                                                                                        |                       |              |                                                                                                    |
|---------------------------------------------|---------|------------|------------------------------------------------------------------------------------------------------------------------------------------------------------------------|-----------------------|--------------|----------------------------------------------------------------------------------------------------|
| Kouassi<br>Nzoughet<br>(2019) <sup>26</sup> | LC-HRMS | untargeted | N-acetyl-L-Leu,<br>1-myristate,1-oleoyl-RAC-glycerol                                                                                                                   | Arg,<br>cystathionine | RAC-glycerol | nicotinamide, hypoxanthine, xanthine,<br>1-methyl-6,7-dihydroxy-1,2,3,4-tetrahydr<br>oisoquinoline |
| Javadiyan<br>(2012) <sup>27</sup>           | LC-MS   | targeted   | ADMA,SDMA                                                                                                                                                              |                       |              | none                                                                                               |
| Umeno<br>(2019) <sup>17</sup>               | HPLC-MS | targeted   | HODE,HETE,9-(Z,E)-HODE/LA,12-(Z,E)-HODE/LA,<br>and 12-(Z,E)-HODE/LA, 13-(Z,E)-HODE/LA,<br>13-(E,E)-HODE/LA,9- and 13-(Z,E)-HODE/LA,<br>5-HETE/AA,12-HETE/AA,15-HETE/AA |                       |              | none                                                                                               |
| Gong<br>(2020) <sup>28</sup>                | GC-MS   | untargeted | DL-Lys,L-γ-Glutamyl-L-Ala,MHPG,17-Hydroxypregnenolo<br>ne sulfate,Hypoxanthine,3a,7a-Dihydroxycholanoic acid                                                           |                       |              | Gly,Gly-l-pro,Citric acid,Aspartyl-L-pro                                                           |
| Rossi<br>(2019) <sup>29</sup>               | UPLC-MS | targeted   | none                                                                                                                                                                   |                       |              | Ala, Arg, Met, Phe, Pro, Val, C2,<br>C22:0-LPC, C24:0-LPC, C0, Tyr                                 |
| Boucard<br>(2007) <sup>30</sup>             | 1H-MRS  | targeted   | none                                                                                                                                                                   |                       |              | none                                                                                               |
| Sidek<br>(2016) <sup>31</sup>               | 1H-MRS  | untargeted | none                                                                                                                                                                   |                       |              | none                                                                                               |
| <b>PACG</b>                                 |         |            |                                                                                                                                                                        |                       |              |                                                                                                    |
| Rong<br>(2017) <sup>32</sup>                | GC-MS   | targeted   | PA, GLA, adrenic acid                                                                                                                                                  |                       |              | LA,ARA                                                                                             |
| <b>PCG</b>                                  |         |            |                                                                                                                                                                        |                       |              |                                                                                                    |
| Chen<br>(2019) <sup>33</sup>                | GC-MS   | untargeted | Gly 2, Phe 1                                                                                                                                                           |                       |              | urea                                                                                               |
| <b>PEXG</b>                                 |         |            |                                                                                                                                                                        |                       |              |                                                                                                    |
| Myer                                        | 1H-NMR  | untargeted | Cr,C6H13NO9,5-hydroxypentanoate                                                                                                                                        |                       |              | propylene glycol,L-Arg, L-Lys, L-Gln,                                                              |

|                      |        |  |  |                                                                                                                               |
|----------------------|--------|--|--|-------------------------------------------------------------------------------------------------------------------------------|
| (2020) <sup>34</sup> | &LC-MS |  |  | L-Tyr,2,4-diacetamido-2,4,6-trideoxy-beta-l-altrose,<br>N(6)-acetyllysine,1-aminocyclopropane-1-carboxylate, L-His, C6H9N4O3P |
|----------------------|--------|--|--|-------------------------------------------------------------------------------------------------------------------------------|

### GLAUCOMA

|                                       |                    |            |      |      |
|---------------------------------------|--------------------|------------|------|------|
| Barbosa Breda<br>(2020) <sup>35</sup> | <sup>1</sup> H-NMR | untargeted | Ala  | none |
| Doganay<br>(2012) <sup>18</sup>       | MRS                | targeted   | none | none |

OAG, Open Angle glaucoma; PACG, Primary angle-closure glaucoma; PEXG, Pseudoexfoliation glaucoma; PCG, Primary congenital glaucoma; AH, Aqueous humor; Arg, Arginine; Leu, Leucine; SM, Sphingomyelin; PC, phosphatidylcholine; ChoE, Cholesteryl esters; DAPC, diacylglycerophosphocholines; MEMAPC, 1-ether, 2-acylglycerophosphocholines; C17, Sphinganine; HODE, Hydroxyarachidonate; C19, Sphingosine 1-phosphate; PA, Palmitoleic acid; GLA, Gamma-linolenic acid; LA, Linoleic acid; ARA, Arachidonic acid; Ala, Alanine; Met, Methionine; Phe, Phenylalanine; Pro, Proline; Val, Valine; C2, Acetylcarnitine; LPC, lysophosphatidylcholine; Ile, isoleucine; C0, Carnitine; Tyr, Tyrosine; Tau, Taurine; C3, Propionylcarnitine; Crea, Creatinine; Gln, Glutamine; Cr, Creatine; Lys, Lysine; His, Histidine; MHPG, 3-methoxy-4-hydroxyphenylglycol; Gly, Glycine; MetSO, methionine sulfoxide; C10:1, decenoylcarnitine; C12:1, dodecenoylcarnitine; C18:1, octadecenoylcarnitine; Cys, Cysteine; AA, Ascorbic acid; Cr, Creatine; Cho, Choline; Thr, Threonine; HETE, hydroxyarachidonate; ADMA, Asymmetric dimethylarginine; SDMA, symmetric dimethylarginine.
