# Supplementary material for: Metabolomics in Glaucoma: A Systematic Review
Source: PubMed Central journal article supplement — Invest Ophthalmol Vis Sci. 2021 May 6;62(6):9. doi: 10.1167/iovs.62.6.9 (PMC8107647; doi:10.1167/iovs.62.6.9), 2021-05-06
Supplement: iovs-62-6-9_s003.pdf [file iovs-62-6-9_s003.pdf]

**Supplementary Table 3** Fold-changes for differential metabolites of glaucoma to controls.

| <b>Differential metabolites</b>                        | <b>Fold change (OAG/Control)</b> |
|--------------------------------------------------------|----------------------------------|
| Kouassi Nzougnet (2019) <sup>26</sup>                  |                                  |
| N-acetyl-L-leucine                                     | 1.846                            |
| Cystathionine                                          | 1.656                            |
| 1-oleoyl-rac-glycerol                                  | 1.608                            |
| 1-oleoyl-RAC-glycerol                                  | 1.608                            |
| RAC-glycerol 1-myristate                               | 1.316                            |
| Arginine                                               | 1.312                            |
| Xanthine                                               | 0.727                            |
| Nicotinamide                                           | 0.643                            |
| Hypoxanthine                                           | 0.558                            |
| 1-methyl-6,7-dihydroxy-1,2,3,4-tetra hydroisoquinoline | 0.469                            |
| Cabreriz (2017) <sup>20</sup>                          |                                  |
| SM(d18:2/16:0)                                         | 1.69                             |
| SM(d18:1/18:0)                                         | 1.59                             |
| SM(36:2)                                               | 1.81                             |
| SM(42:3)                                               | 1.72                             |
| SM(d18:2/22:0)                                         | 1.54                             |
| ChoE(16:0)                                             | 1.68                             |
| SM(38:1)                                               | 1.62                             |
| PC(18:0/18:2)                                          | 1.31                             |
| ChoE(18:2)                                             | 2.15                             |
| PC(O-24:1/20:4)                                        | 1.79                             |
| ChoE(18:1)                                             | 2.09                             |
| SM(d18:2/20:0)                                         | 2.75                             |
| SM(d18:1/16:0)                                         | 1.41                             |
| ChoE(20:4)                                             | 2.44                             |
| ChoE(20:3)                                             | 2.43                             |
| PC(40:1)                                               | 0.22                             |
| PC(O-38:4)                                             | 0.23                             |
| Leruez (2018) <sup>25</sup>                            |                                  |
| Methionine sulfoxide                                   | 1.31                             |
| Propionyl-carnitine                                    | 1.30                             |
| Methionine                                             | 1.27                             |
| Tyrosine                                               | 1.25                             |
| PC aa 34:4                                             | 1.22                             |
| PC ae 40:1                                             | 1.18                             |
| PC aa 34:2                                             | 1.15                             |
| PC aa 36:4                                             | 1.15                             |
| Hexose                                                 | 1.09                             |
| Spermine                                               | 0.97                             |
| Spermidine                                             | 0.90                             |
| Octadecadienyl-carnitine                               | 0.82                             |

---

SM, Sphingomyelin; PC, phosphatidylcholine; ChoE, Cholesteryl esters
