# Supplementary material for: Metabolomics in Glaucoma: A Systematic Review
Source: PubMed Central journal article supplement — Invest Ophthalmol Vis Sci. 2021 May 6;62(6):9. doi: 10.1167/iovs.62.6.9 (PMC8107647; doi:10.1167/iovs.62.6.9), 2021-05-06
Supplement: iovs-62-6-9_s004.pdf [file iovs-62-6-9_s004.pdf]

**Supplementary Table 4** Pathway analysis of metabolic biomarkers in AH on OAG.

| Pathway Name                                | Match Status | P          | FDR        | Impact  |
|---------------------------------------------|--------------|------------|------------|---------|
| Aminoacyl-tRNA biosynthesis                 | 10/48        | 1.0015E-07 | 8.4124E-06 | 0       |
| Arginine and proline metabolism             | 6/38         | 0.00026094 | 0.01096    | 0.18883 |
| Valine, leucine and isoleucine biosynthesis | 3/8          | 0.00075666 | 0.021187   | 0       |
| Glycine, serine and threonine metabolism    | 5/33         | 0.0010987  | 0.023073   | 0.24577 |
| Arginine biosynthesis                       | 3/14         | 0.0044277  | 0.063554   | 0.07614 |
| Glutathione metabolism                      | 4/28         | 0.0045396  | 0.063554   | 0.09935 |
| Taurine and hypotaurine metabolism          | 2/8          | 0.015701   | 0.18841    | 0.42857 |
| Biotin metabolism                           | 2/10         | 0.024444   | 0.25667    | 0.2     |
| Galactose metabolism                        | 3/27         | 0.028382   | 0.26244    | 0.0338  |
| Alanine, aspartate and glutamate metabolism | 3/28         | 0.031243   | 0.26244    | 0.20032 |
| Glyoxylate and dicarboxylate metabolism     | 3/32         | 0.04415    | 0.33714    | 0.10582 |

OAG, Open Angle glaucoma; AH, Aqueous humo
