# Supplementary material for: Metabolomics in Glaucoma: A Systematic Review
Source: PubMed Central journal article supplement — Invest Ophthalmol Vis Sci. 2021 May 6;62(6):9. doi: 10.1167/iovs.62.6.9 (PMC8107647; doi:10.1167/iovs.62.6.9), 2021-05-06
Supplement: iovs-62-6-9_s005.pdf [file iovs-62-6-9_s005.pdf]

**Supplementary Table 5** Pathway analysis of metabolic biomarkers in plasma on OAG.

| Pathway Name                    | Match Status | P        | FDR     | Impact  |
|---------------------------------|--------------|----------|---------|---------|
| Arginine and proline metabolism | 3/38         | 0.013334 | 0.66047 | 0.09187 |
| Aminoacyl-tRNA biosynthesis     | 3/48         | 0.025055 | 0.66047 | 0       |
| beta-Alanine metabolism         | 2/21         | 0.031451 | 0.66047 | 0.05597 |
| Sphingolipid metabolism         | 2/21         | 0.031451 | 0.66047 | 0.1785  |

OAG, Open Angle glaucoma
