# Supplementary material for: Metabolomics in Glaucoma: A Systematic Review
Source: PubMed Central journal article supplement — Invest Ophthalmol Vis Sci. 2021 May 6;62(6):9. doi: 10.1167/iovs.62.6.9 (PMC8107647; doi:10.1167/iovs.62.6.9), 2021-05-06
Supplement: iovs-62-6-9_s006.pdf [file iovs-62-6-9_s006.pdf]

**Supplementary Table 6** Pathway analysis of metabolic biomarkers in serum on OAG.

| Pathway Name                            | Match Status | P         | FDR     | Impact  |
|-----------------------------------------|--------------|-----------|---------|---------|
| Glutathione metabolism                  | 2/28         | 0.0030443 | 0.1669  | 0.11165 |
| Glyoxylate and dicarboxylate metabolism | 2/32         | 0.0039738 | 0.1669  | 0.13757 |
| Aminoacyl-tRNA biosynthesis             | 2/48         | 0.0088499 | 0.2478  | 0       |
| Biotin metabolism                       | 1/10         | 0.031885  | 0.66959 | 0       |

OAG, Open Angle glaucoma
