# Supplementary material for: Metabolomics in Glaucoma: A Systematic Review
Source: PubMed Central journal article supplement — Invest Ophthalmol Vis Sci. 2021 May 6;62(6):9. doi: 10.1167/iovs.62.6.9 (PMC8107647; doi:10.1167/iovs.62.6.9), 2021-05-06
Supplement: iovs-62-6-9_s007.pdf [file iovs-62-6-9_s007.pdf]

**Supplementary Table 7** Pathway analysis of metabolic biomarkers in tear on OAG.

| Pathway Name                                        | Match Status | P         | FDR       | Impact  |
|-----------------------------------------------------|--------------|-----------|-----------|---------|
| Aminoacyl-tRNA biosynthesis                         | 7/48         | 6.01E-10  | 5.05E-08  | 0       |
| Phenylalanine, tyrosine and tryptophan biosynthesis | 2/4          | 1.79E-04  | 0.0075115 | 1       |
| Phenylalanine metabolism                            | 2/10         | 0.0013173 | 0.036883  | 0.35714 |
| Arginine and proline metabolism                     | 2/38         | 0.018907  | 0.39704   | 0.13566 |
| Valine, leucine and isoleucine biosynthesis         | 1/8          | 0.04562   | 0.71666   | 0       |

OAG, Open Angle glaucoma
